# Supplementary material
Source: publisher site journal article supplement (https://www.dovepress.com/get_supplementary_file.php?f=304911.docx)
Supplement: Supplementary file 1 [file get_supplementary_file.php]

**Table S1. Information for candidate bioactive components of HLJDD.**

| Herb | Number | Molecule Name | MW | OB (%) | DL | Molecules structure |
| --- | --- | --- | --- | --- | --- | --- |
| CR/ PCC | MOL001454 | [berberine](https://tcmspw.com/molecule.php?qn=1454) | 336.39 | 36.86 | 0.78 | 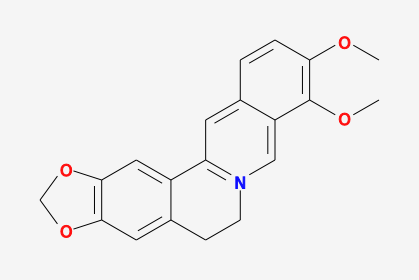 |
| CR/ PCC | MOL013352 | [Obacunone](https://tcmspw.com/molecule.php?qn=13352) | 454.56 | 43.29 | 0.77 | 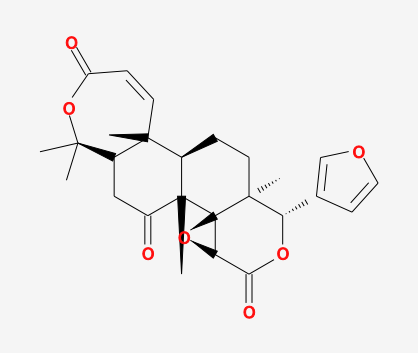 |
| CR/ PCC | MOL002894 | [berberrubine](https://tcmspw.com/molecule.php?qn=2894) | 322.36 | 35.74 | 0.73 | 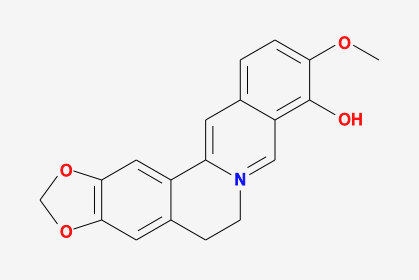 |
| CR/ SR | MOL002897 | [epiberberine](https://tcmspw.com/molecule.php?qn=2897) | 336.39 | 43.09 | 0.78 | 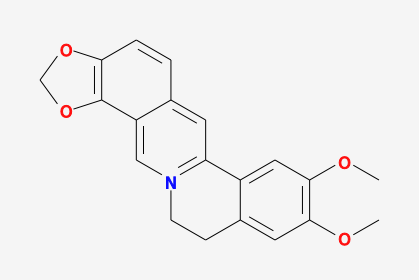 |
| CR | MOL002903 | [(R)-Canadine](https://tcmspw.com/molecule.php?qn=2903) | 339.42 | 55.37 | 0.77 | 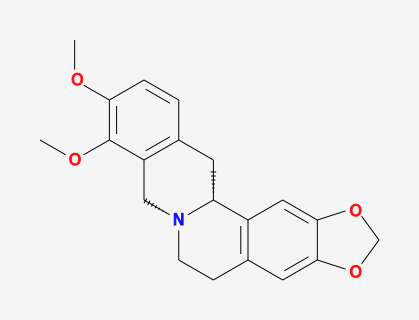 |
| CR | MOL002904 | [Berlambine](https://tcmspw.com/molecule.php?qn=2904) | 351.38 | 36.68 | 0.82 | 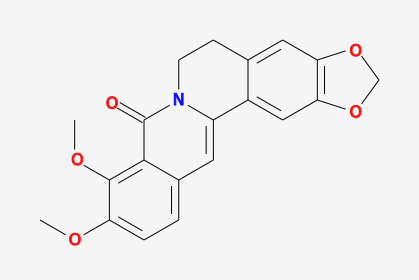 |
| CR | MOL002907 | [Corchoroside A_qt](https://tcmspw.com/molecule.php?qn=2907) | 404.55 | 104.95 | 0.78 | 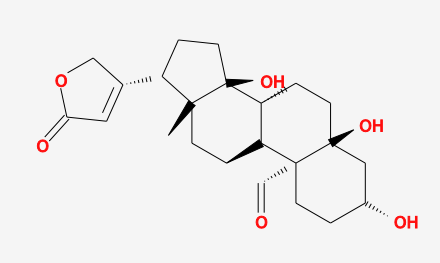 |
| CR/ PCC | MOL000622 | [Magnograndiolide](https://tcmspw.com/molecule.php?qn=622) | 266.37 | 63.71 | 0.19 | 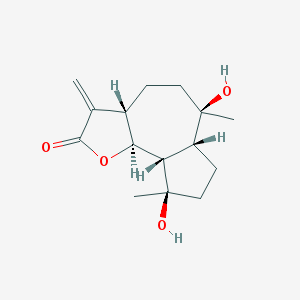 |
| CR/ PCC | MOL000762 | [Palmidin A](https://tcmspw.com/molecule.php?qn=762) | 510.52 | 35.36 | 0.65 | 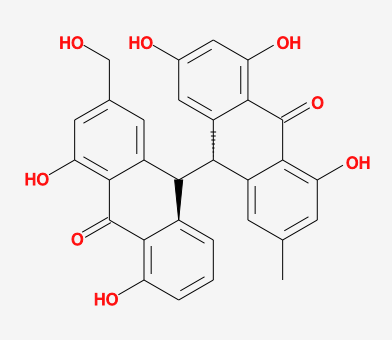 |
| CR/ PCC | MOL000785 | [palmatine](https://tcmspw.com/molecule.php?qn=785) | 352.44 | 64.6 | 0.65 | 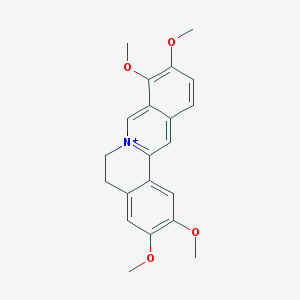 |
| CR/ PCC | MOL000098 | [quercetin](https://tcmspw.com/molecule.php?qn=98) | 302.25 | 46.43 | 0.28 | 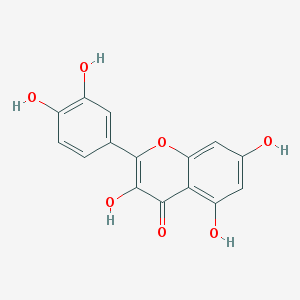 |
| CR/ PCC/ SR | MOL001458 | [coptisine](https://tcmspw.com/molecule.php?qn=1458) | 320.34 | 30.67 | 0.86 | 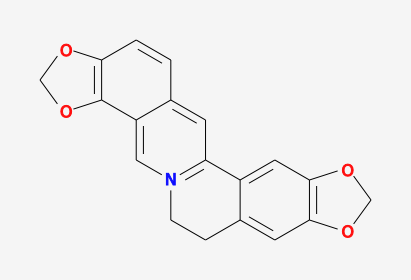 |
| CR/ PCC | MOL002668 | [Worenine](https://tcmspw.com/molecule.php?qn=2668) | 334.37 | 45.83 | 0.87 | 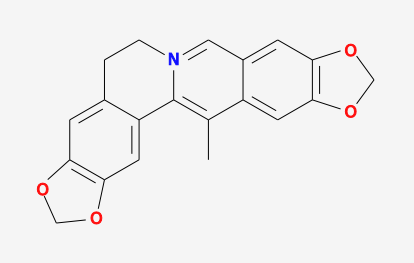 |
| CR | MOL008647 | [Moupinamide](https://tcmspw.com/molecule.php?qn=8647) | 313.38 | 86.71 | 0.26 | 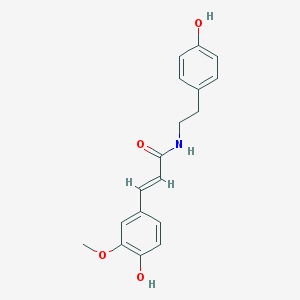 |
| SR | MOL001689 | [acacetin](https://tcmspw.com/molecule.php?qn=1689) | 284.28 | 34.97 | 0.24 | 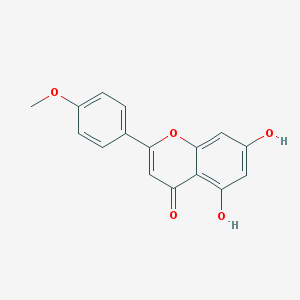 |
| SR | MOL000173 | [wogonin](https://tcmspw.com/molecule.php?qn=173) | 284.28 | 30.68 | 0.23 | 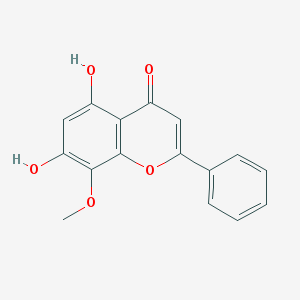 |
| SR | MOL000228 | [(2R)-7-hydroxy-5-methoxy-2-phenylchroman-4-one](https://tcmspw.com/molecule.php?qn=228) | 270.3 | 55.23 | 0.2 | 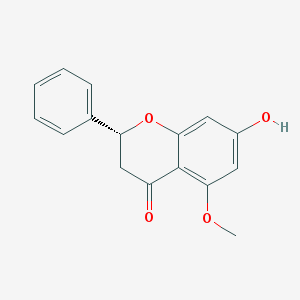 |
| SR | MOL002714 | [baicalein](https://tcmspw.com/molecule.php?qn=2714) | 270.25 | 33.52 | 0.21 | 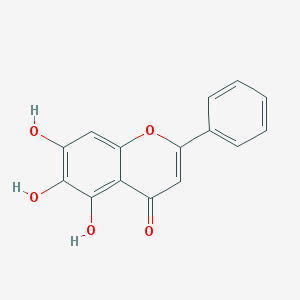 |
| SR | MOL002908 | [5,8,2'-Trihydroxy-7-methoxyflavone](https://tcmspw.com/molecule.php?qn=2908) | 300.28 | 37.01 | 0.27 | 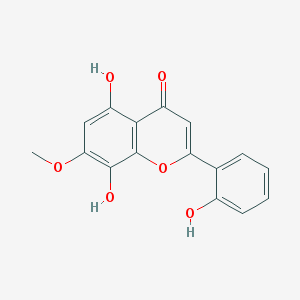 |
| SR | MOL002909 | [5,7,2,5-tetrahydroxy-8,6-dimethoxyflavone](https://tcmspw.com/molecule.php?qn=2909) | 376.34 | 33.82 | 0.45 | 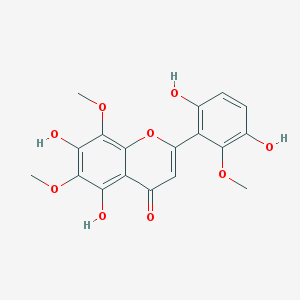 |
| SR | MOL002910 | [Carthamidin](https://tcmspw.com/molecule.php?qn=2910) | 288.27 | 41.15 | 0.24 | 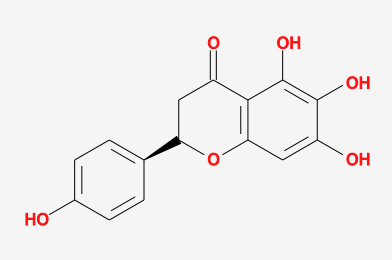 |
| SR | MOL002911 | [2,6,2',4'-tetrahydroxy-6'-methoxychaleone](https://tcmspw.com/molecule.php?qn=2911) | 302.3 | 69.04 | 0.22 | 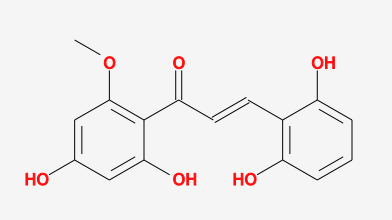 |
| SR | MOL002913 | [Dihydrobaicalin_qt](https://tcmspw.com/molecule.php?qn=2913) | 272.27 | 40.04 | 0.21 | 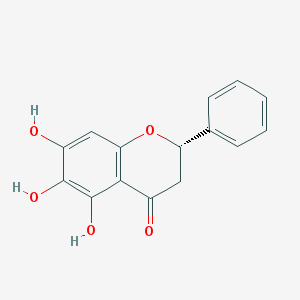 |
| SR | MOL002914 | [Eriodyctiol (flavanone)](https://tcmspw.com/molecule.php?qn=2914) | 288.27 | 41.35 | 0.24 | 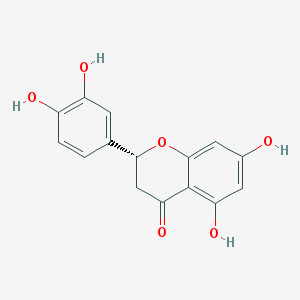 |
| SR | MOL002915 | [Salvigenin](https://tcmspw.com/molecule.php?qn=2915) | 328.34 | 49.07 | 0.33 | 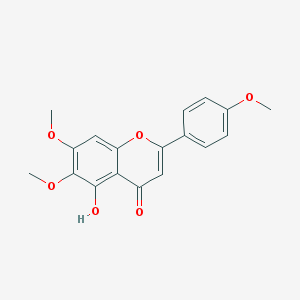 |
| SR | MOL002917 | [5,2',6'-Trihydroxy-7,8-dimethoxyflavone](https://tcmspw.com/molecule.php?qn=2917) | 330.31 | 45.05 | 0.33 | 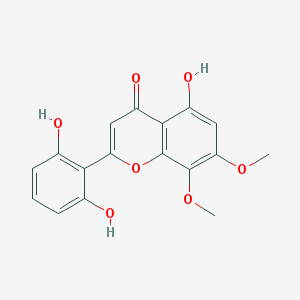 |
| SR | MOL002925 | [5,7,2',6'-Tetrahydroxyflavone](https://tcmspw.com/molecule.php?qn=2925) | 286.25 | 37.01 | 0.24 | 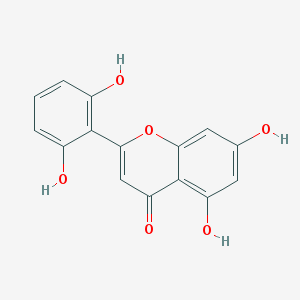 |
| SR | MOL002926 | [dihydrooroxylin A](https://tcmspw.com/molecule.php?qn=2926) | 286.3 | 38.72 | 0.23 | 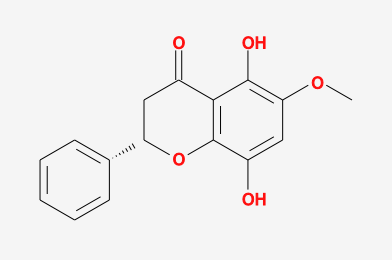 |
| SR | MOL002927 | [Skullcapflavone II](https://tcmspw.com/molecule.php?qn=2927) | 374.37 | 69.51 | 0.44 | 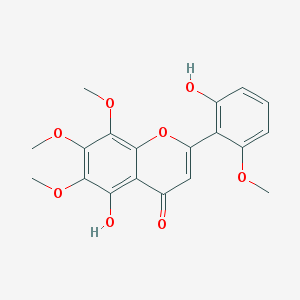 |
| SR | MOL002928 | [oroxylin a](https://tcmspw.com/molecule.php?qn=2928) | 284.28 | 41.37 | 0.23 | 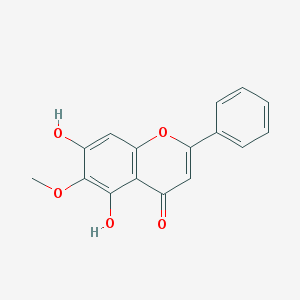 |
| SR | MOL002932 | [Panicolin](https://tcmspw.com/molecule.php?qn=2932) | 314.31 | 76.26 | 0.29 | 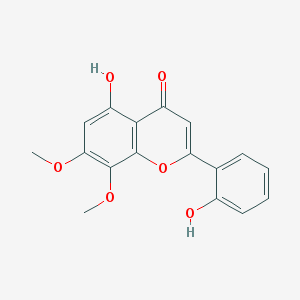 |
| SR | MOL002933 | [5,7,4'-Trihydroxy-8-methoxyflavone](https://tcmspw.com/molecule.php?qn=2933) | 300.28 | 36.56 | 0.27 | 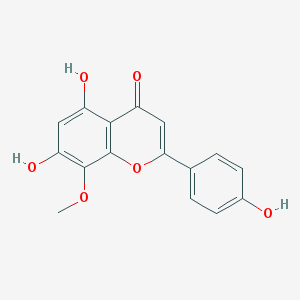 |
| SR | MOL002934 | [NEOBAICALEIN](https://tcmspw.com/molecule.php?qn=2934) | 374.37 | 104.34 | 0.44 | 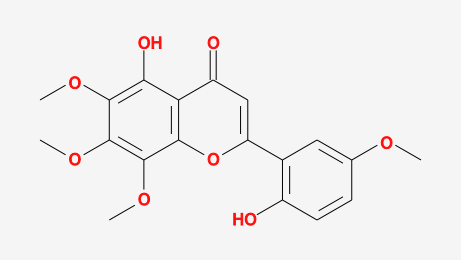 |
| SR | MOL002937 | [DIHYDROOROXYLIN](https://tcmspw.com/molecule.php?qn=2937) | 286.3 | 66.06 | 0.23 | 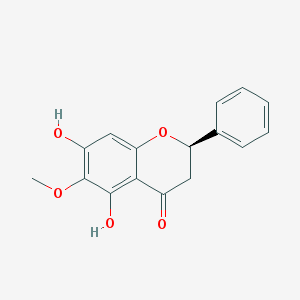 |
| SR | MOL000358 | [beta-sitosterol](https://tcmspw.com/molecule.php?qn=358) | 414.79 | 36.91 | 0.75 | 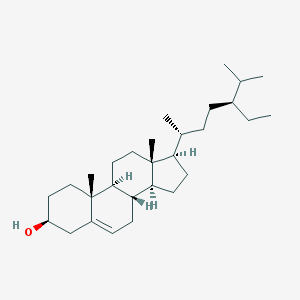 |
| SR | MOL000359 | [sitosterol](https://tcmspw.com/molecule.php?qn=359) | 414.79 | 36.91 | 0.75 | 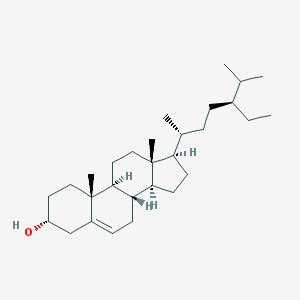 |
| SR | MOL000525 | [Norwogonin](https://tcmspw.com/molecule.php?qn=525) | 270.25 | 39.4 | 0.21 | 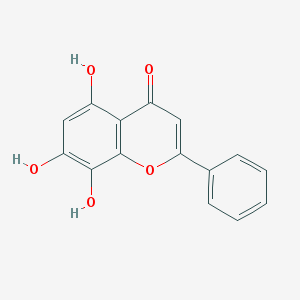 |
| SR | MOL000552 | [5,2'-Dihydroxy-6,7,8-trimethoxyflavone](https://tcmspw.com/molecule.php?qn=552) | 344.34 | 31.71 | 0.35 | 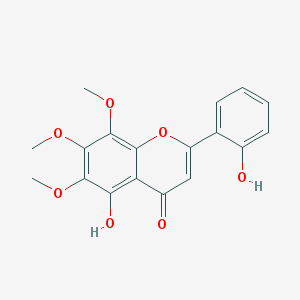 |
| SR | MOL000073 | [ent-Epicatechin](https://tcmspw.com/molecule.php?qn=73) | 290.29 | 48.96 | 0.24 | 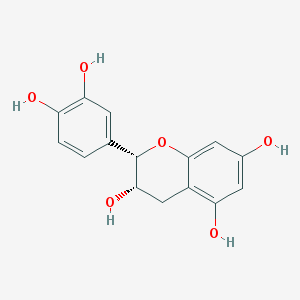 |
| SR | MOL000449 | [Stigmasterol](https://tcmspw.com/molecule.php?qn=449) | 412.77 | 43.83 | 0.76 | 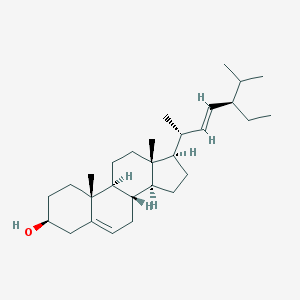 |
| SR | MOL001490 | [bis[(2S)-2-ethylhexyl] benzene-1,2-dicarboxylate](https://tcmspw.com/molecule.php?qn=1490) | 390.62 | 43.59 | 0.35 | 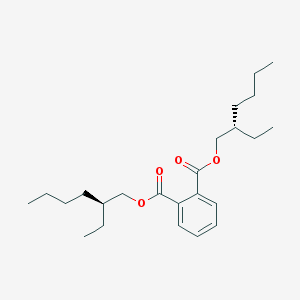 |
| SR | MOL001506 | [Supraene](https://tcmspw.com/molecule.php?qn=1506) | 410.8 | 33.55 | 0.42 | 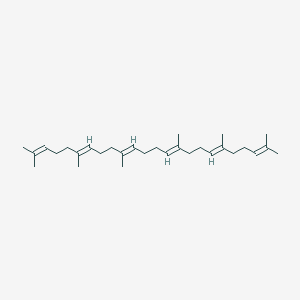 |
| SR | MOL002879 | [Diop](https://tcmspw.com/molecule.php?qn=2879) | 390.62 | 43.59 | 0.39 | 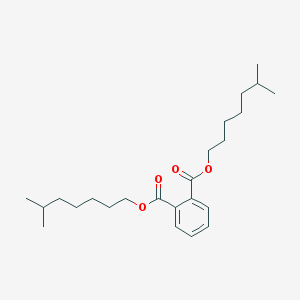 |
| SR | MOL008206 | [Moslosooflavone](https://tcmspw.com/molecule.php?qn=8206) | 298.31 | 44.09 | 0.25 | 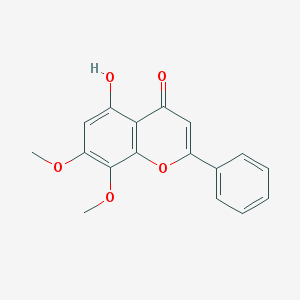 |
| SR | MOL010415 | [11,13-Eicosadienoic acid, methyl ester](https://tcmspw.com/molecule.php?qn=10415) | 322.59 | 39.28 | 0.23 | 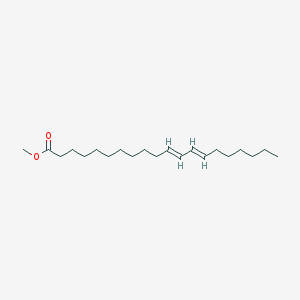 |
| SR | MOL012245 | [5,7,4'-trihydroxy-6-methoxyflavanone](https://tcmspw.com/molecule.php?qn=12245) | 302.3 | 36.63 | 0.27 | 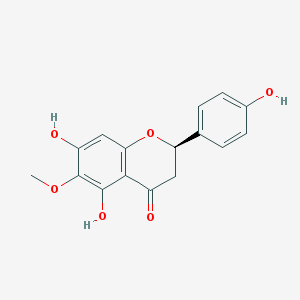 |
| SR | MOL012246 | [5,7,4'-trihydroxy-8-methoxyflavanone](https://tcmspw.com/molecule.php?qn=12246) | 302.3 | 74.24 | 0.26 | 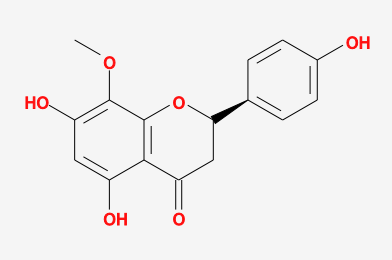 |
| SR | MOL012266 | [rivularin](https://tcmspw.com/molecule.php?qn=12266) | 344.34 | 37.94 | 0.37 | 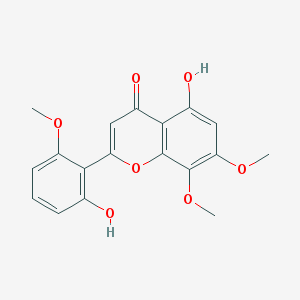 |
| PCC | MOL000787 | [Fumarine](http://tcmspw.com/molecule.php?qn=787) | 353.4 | 59.26 | 0.83 | 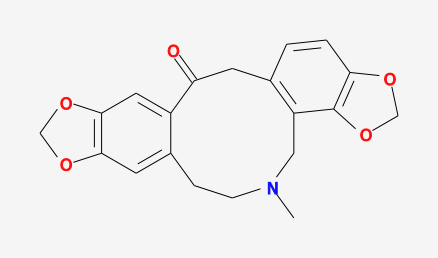 |
| PCC | MOL000790 | [Isocorypalmine](http://tcmspw.com/molecule.php?qn=790) | 341.44 | 35.77 | 0.59 | 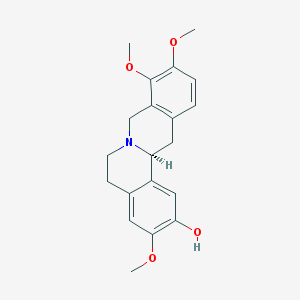 |
| PCC | MOL001131 | [phellamurin_qt](http://tcmspw.com/molecule.php?qn=1131) | 356.4 | 56.6 | 0.39 | 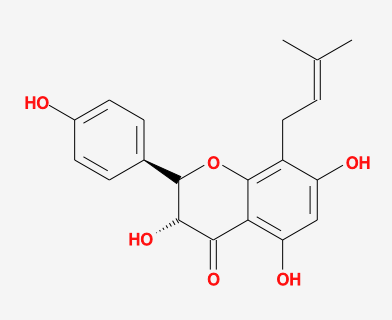 |
| PCC | MOL001455 | [(S)-Canadine](http://tcmspw.com/molecule.php?qn=1455) | 339.42 | 53.83 | 0.77 | 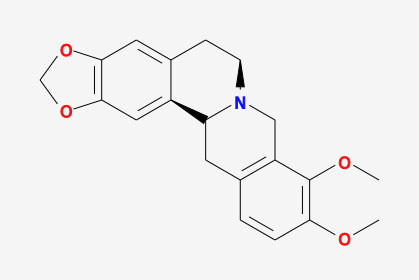 |
| PCC | MOL002636 | [Kihadalactone A](http://tcmspw.com/molecule.php?qn=2636) | 512.7 | 34.21 | 0.82 | 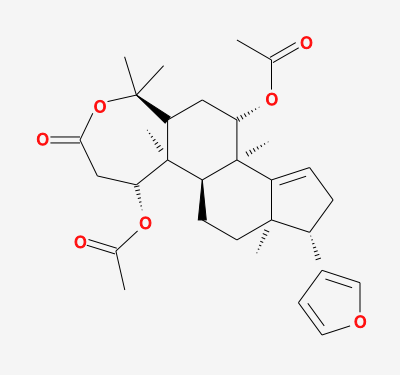 |
| PCC | MOL002641 | [Phellavin_qt](http://tcmspw.com/molecule.php?qn=2641) | 374.42 | 35.86 | 0.44 | 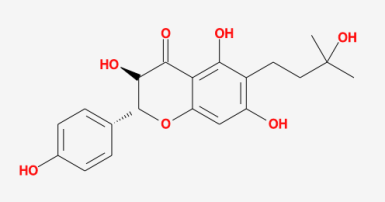 |
| PCC | MOL002643 | [delta 7-stigmastenol](http://tcmspw.com/molecule.php?qn=2643) | 414.79 | 37.42 | 0.75 | 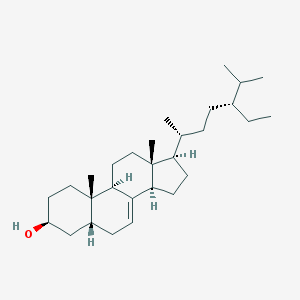 |
| PCC | MOL002644 | [Phellopterin](http://tcmspw.com/molecule.php?qn=2644) | 300.33 | 40.19 | 0.28 | 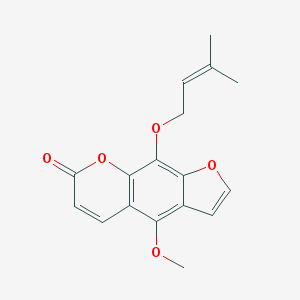 |
| PCC | MOL002651 | [Dehydrotanshinone II A](http://tcmspw.com/molecule.php?qn=2651) | 292.35 | 43.76 | 0.4 | 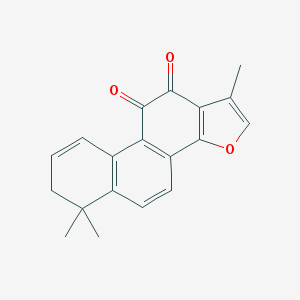 |
| PCC | MOL002652 | [delta7-Dehydrosophoramine](http://tcmspw.com/molecule.php?qn=2652) | 242.35 | 54.45 | 0.25 | 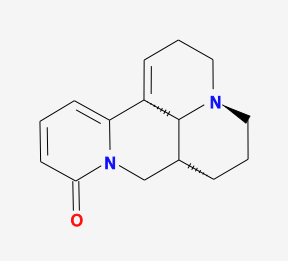 |
| PCC | MOL002656 | [dihydroniloticin](http://tcmspw.com/molecule.php?qn=2656) | 458.8 | 36.43 | 0.81 | 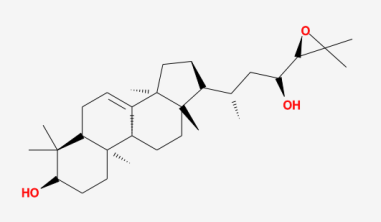 |
| PCC | MOL002659 | [kihadanin A](http://tcmspw.com/molecule.php?qn=2659) | 486.56 | 31.6 | 0.7 | 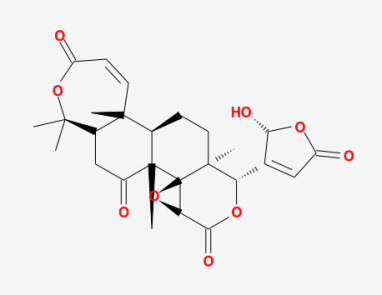 |
| PCC | MOL002660 | [niloticin](http://tcmspw.com/molecule.php?qn=2660) | 456.78 | 41.41 | 0.82 | 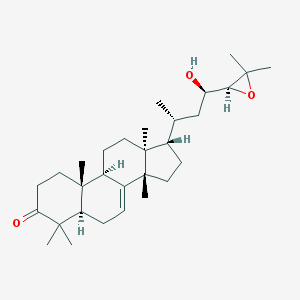 |
| PCC | MOL002662 | [rutaecarpine](http://tcmspw.com/molecule.php?qn=2662) | 287.34 | 40.3 | 0.6 | 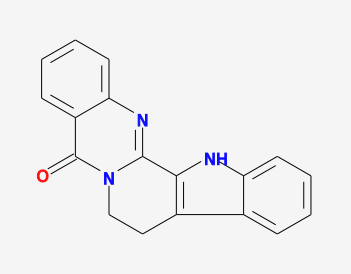 |
| PCC | MOL002663 | [Skimmianin](http://tcmspw.com/molecule.php?qn=2663) | 259.28 | 40.14 | 0.2 | 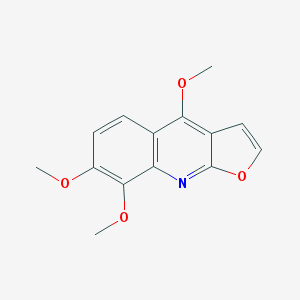 |
| PCC | MOL002666 | [Chelerythrine](http://tcmspw.com/molecule.php?qn=2666) | 332.37 | 34.18 | 0.78 | 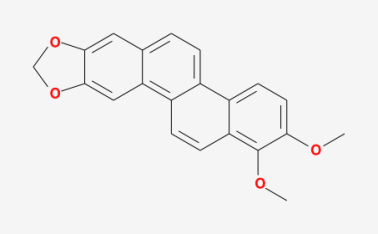 |
| PCC | MOL002670 | [Cavidine](http://tcmspw.com/molecule.php?qn=2670) | 353.45 | 35.64 | 0.81 | 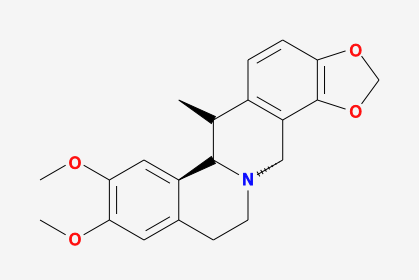 |
| PCC | MOL002671 | [Candletoxin A](http://tcmspw.com/molecule.php?qn=2671) | 608.79 | 31.81 | 0.69 | 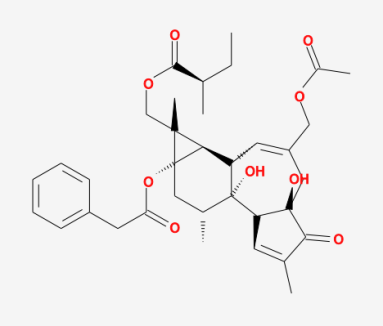 |
| PCC | MOL002672 | [Hericenone H](http://tcmspw.com/molecule.php?qn=2672) | 580.88 | 39 | 0.63 | 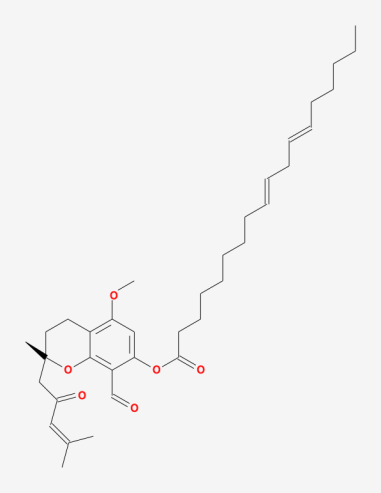 |
| PCC | MOL002673 | [Hispidone](http://tcmspw.com/molecule.php?qn=2673) | 472.78 | 36.18 | 0.83 | 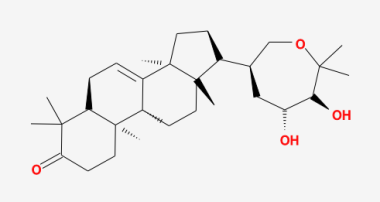 |
| PCC | MOL005438 | [campesterol](http://tcmspw.com/molecule.php?qn=5438) | 400.76 | 37.58 | 0.71 | 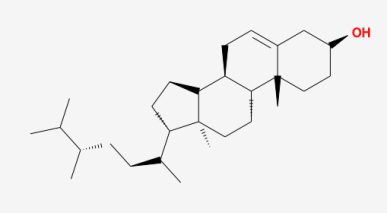 |
| PCC | MOL006392 | [dihydroniloticin](http://tcmspw.com/molecule.php?qn=6392) | 458.8 | 36.43 | 0.82 | 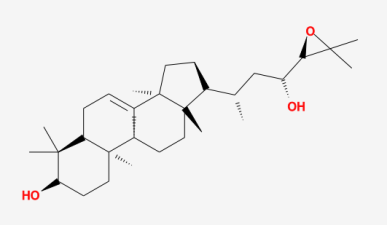 |
| PCC | MOL006401 | [melianone](http://tcmspw.com/molecule.php?qn=6401) | 470.76 | 40.53 | 0.78 | 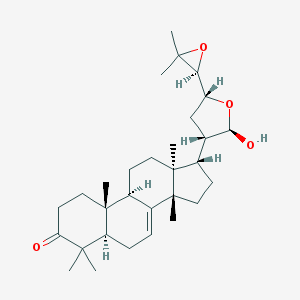 |
| PCC | MOL006413 | [phellochin](http://tcmspw.com/molecule.php?qn=6413) | 488.83 | 35.41 | 0.82 | 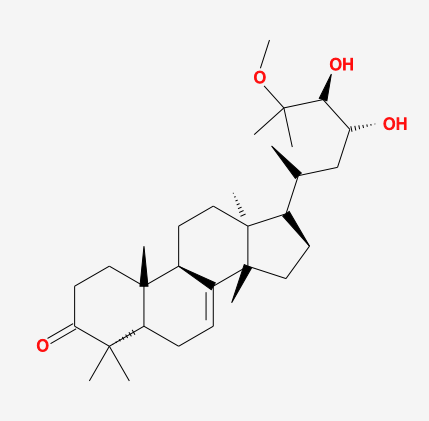 |
| PCC | MOL006422 | [thalifendine](http://tcmspw.com/molecule.php?qn=6422) | 322.36 | 44.41 | 0.73 | 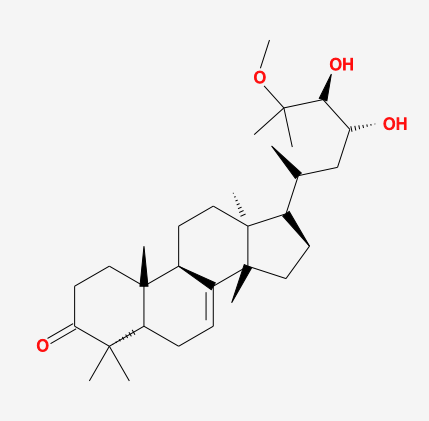 |
| GF | MOL001406 | [crocetin](http://tcmspw.com/molecule.php?qn=1406) | 328.44 | 35.3 | 0.26 | 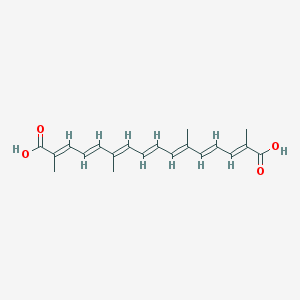 |
| GF | MOL001663 | [(4aS,6aR,6aS,6bR,8aR,10R,12aR,14bS)-10-hydroxy-2,2,6a,6b,9,9,12a-heptamethyl-1,3,4,5,6,6a,7,8,8a,10,11,12,13,14b-tetradecahydropicene-4a-carboxylic acid](http://tcmspw.com/molecule.php?qn=1663) | 456.78 | 32.03 | 0.76 | 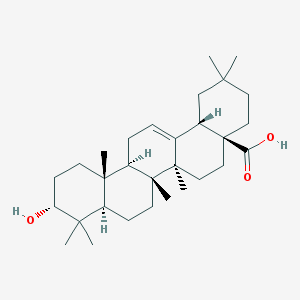 |
| GF | MOL001941 | [Ammidin](http://tcmspw.com/molecule.php?qn=1941) | 270.3 | 34.55 | 0.22 | 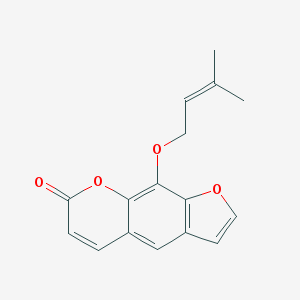 |
| GF | MOL000422 | [kaempferol](http://tcmspw.com/molecule.php?qn=422) | 286.25 | 41.88 | 0.24 | 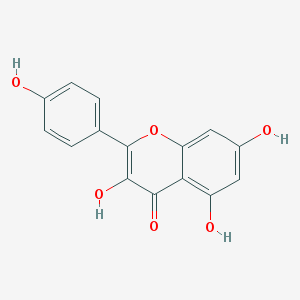 |
| GF | MOL001942 | [isoimperatorin](http://tcmspw.com/molecule.php?qn=1942) | 270.3 | 45.46 | 0.23 | 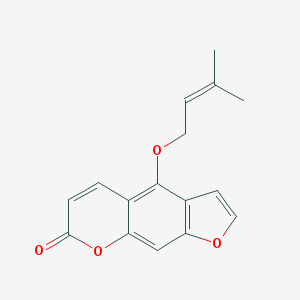 |
| GF | MOL002883 | [Ethyl oleate (NF)](http://tcmspw.com/molecule.php?qn=2883) | 310.58 | 32.4 | 0.19 | 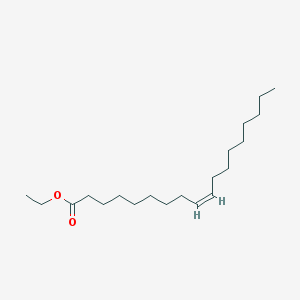 |
| GF | MOL003095 | [5-hydroxy-7-methoxy-2-(3,4,5-trimethoxyphenyl)chromone](http://tcmspw.com/molecule.php?qn=3095) | 358.37 | 51.96 | 0.41 | 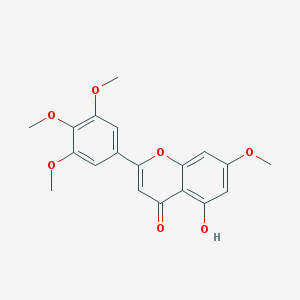 |
| GF | MOL007245 | [3-Methylkempferol](http://tcmspw.com/molecule.php?qn=7245) | 300.28 | 60.16 | 0.26 | 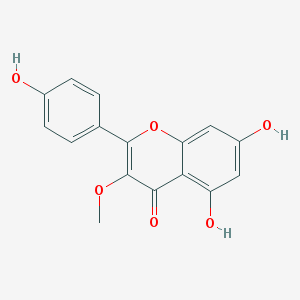 |
| GF | MOL009038 | [GBGB](http://tcmspw.com/molecule.php?qn=9038) | 550.57 | 45.58 | 0.83 | 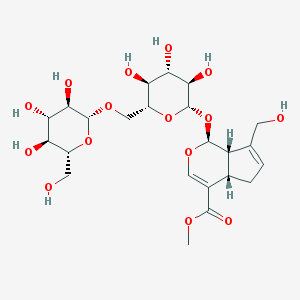 |

CR: Coptidis Rhizoma; SR: Scutellariae Radix; PCC: Phellodendri Chinensis Cortex; GF: Gardeniae Fructus.

**Table S2. Protein targets of HLJDD.**

| Target | Common name | Uniprot ID |
| --- | --- | --- |
| Myeloperoxidase | MPO | P05164 |
| Phosphoinositide-3-Kinase Regulatory Subunit 1 | PIK3R1 | P27986 |
| Adenosine A2a receptor | ADORA2A | P29274 |
| Death Associated Protein Kinase 1 | DAPK1 | P53355 |
| SRC Proto-Oncogene, Non-Receptor Tyrosine Kinase | SRC | P12931 |
| Protein Tyrosine Kinase 2 | PTK2 | Q05397 |
| Matrix metalloproteinase 13 | MMP13 | P45452 |
| Matrix metalloproteinase 3 | MMP3 | P08254 |
| Carbonic anhydrase III | CA3 | P07451 |
| Arachidonate 15-lipoxygenase | ALOX15 | P16050 |
| Multidrug resistance-associated protein 1 | ABCC1 | P33527 |
| Matrix metalloproteinase 9 | MMP9 | P14780 |
| Phosphatidylinositol-4,5-Bisphosphate 3-Kinase Catalytic Subunit Gamma | PIK3CG | P48736 |
| Matrix metalloproteinase 2 | MMP2 | P08253 |
| Protein kinase N1 | PKN1 | Q16512 |
| Casein Kinase 2 Alpha 1 | CSNK2A1 | P68400 |
| Arachidonate 12-lipoxygenase | ALOX12 | P18054 |
| Hepatocyte growth factor receptor | MET | P08581 |
| CaM kinase II beta | CAMK2B | Q13554 |
| Anaplastic Lymphoma Receptor Tyrosine Kinase | ALK | Q9UM73 |
| AKT Serine/Threonine Kinase 1 | AKT1 | P31749 |
| Cytochrome P450 1B1 | CYP1B1 | Q16678 |
| Tyrosine-protein kinase receptor UFO | AXL | P30530 |
| ATP-binding cassette sub-family G member 2 | ABCG2 | Q9UNQ0 |
| Apurinic/Apyrimidinic Endodeoxyribonuclease 1 | APEX1 | P27695 |
| Aldo-keto reductase family 1 member C4 | AKR1C4 | P17516 |
| Aldo-Keto Reductase Family 1 Member A1 | AKR1A1 | P14550 |
| Cyclin-dependent kinase 6 | CDK6 | Q00534 |
| Cyclin-dependent kinase 2 | CDK2 | P24941 |
| Arginase-1 | ARG1 | P05089 |
| Tyrosinase | TYR | P14679 |
| Aryl hydrocarbon receptor | AHR | P35869 |
| Beta-galactoside alpha-2,6-sialyltransferase 1 | ST6GAL1 | P15907 |
| Solute carrier family 22 member 12 | SLC22A12 | Q96S37 |
| Poly [ADP-ribose] polymerase-1 | PARP1 | P09874 |
| Transthyretin | TTR | P02766 |
| Matrix metalloproteinase 12 | MMP12 | P39900 |
| CD38 Molecule | CD38 | P28907 |
| Aldo-keto reductase family 1 member B10 | AKR1B10 | O60218 |
| Matrix metalloproteinase 1 | MMP1 | P03956 |
| Monoamine oxidase B | MAOB | P27338 |
| C-C chemokine receptor type 2 | CCR2 | P41597 |
| Forkhead box protein O1 | FOXO1 | Q12778 |
| Calpain 1 | CAPN1 | P07384 |
| Rat anti-rabbit macrophage antibody 11 | RAM11 | A5HC69 |
| Cytochrome P450 2C9 | CYP2C9 | P11712 |
| Cytochrome P450 3A4 | CYP3A4 | P08684 |
| Dihydrofolate reductase | DHFR | P00374 |
| Melanocortin receptor 4 | MC4R | P32245 |
| 5-lipoxygenase activating protein | ALOX5AP | P20292 |
| Phosphodiesterase 4B | PDE4B | Q07343 |
| Intercellular cell adhesion molecule-1 | ICAM1 | P05362 |
| Acyl coenzyme A:cholesterol acyltransferase 1 | SOAT1 | P35610 |
| Nuclear factor erythroid 2-related factor 2 | NFE2L2 | Q16236 |
| Janus Kinase 1 | JAK1 | P23458 |
| Fms Related Receptor Tyrosine Kinase 4 | FLT4 | P35916 |
| Epoxide hydratase 2 | EPHX2 | P34913 |
| LYN Proto-Oncogene, Src Family Tyrosine Kinase | LYN | P07948 |
| Complement factor D | CFD | P00746 |
| Colony Stimulating Factor 1 Receptor | CSF1R | P07333 |
| Interleukin-1 receptor-associated kinase 4 | IRAK4 | Q9NWZ3 |
| P2X purinoceptor 7 | P2RX7 | Q99572 |
| Platelet endothelial cell adhesion molecule-1 | CD31 | P16284 |
| Isocitrate Dehydrogenase (NADP(+)) 1 | IDH1 | O75874 |
| Voltage-gated L-type calcium channel alpha-1C subunit | CACNA1C | Q13936 |
| Tyrosine-protein kinase TIE-2 | TEK | Q02763 |
| Histone deacetylase 3 | HDAC3 | O15379 |
| Histone deacetylase 6 | HDAC6 | Q9UBN7 |
| Histone deacetylase 2 | HDAC2 | Q92769 |
| Histone deacetylase 5 | HDAC5 | Q9UQL6 |
| Heat Shock Protein 90 Alpha Family Class B Member 1 | HSP90AB1 | P08238 |
| Butyrylcholinesterase | BCHE | P06276 |
| Adrenergic receptor alpha-2 | ADRA2C | P18825 |
| Alpha-2b adrenergic receptor | ADRA2B | P18089 |
| Muscarinic acetylcholine receptor M1 | CHRM1 | P11229 |
| Cytochrome P450 2D6 | CYP2D6 | P10635 |
| Histone deacetylase 7 | HDAC7 | Q8WUI4 |
| Histone deacetylase 4 | HDAC4 | P56524 |
| Histone deacetylase 9 | HDAC9 | Q9UKV0 |
| 5-Hydroxytryptamine Receptor 3A | HTR3A | P46098 |
| Glucagon-like peptide 1 receptor | GLP1R | P43220 |
| Cell division control protein 42 homolog | CDC42 | P60953 |
| Peptidyl-prolyl cis-trans isomerase NIMA-interacting 1 | PIN1 | Q13526 |
| Lysine-specific demethylase 4C | KDM4C | Q9H3R0 |
| Muscarinic acetylcholine receptor M3 | CHRM3 | P20309 |
| Galectin-3 | LGALS3 | P17931 |
| Galectin-9 | LGALS9 | O00182 |
| Thymidylate synthase | TYMS | P04818 |
| Urotensin II receptor | UTS2R | Q9UKP6 |
| Heat Shock Protein 90 Alpha Family Class A Member 1 | HSP90AA1 | P07900 |
| Epoxide hydrolase 1 | EPHX1 | P07099 |
| Solute Carrier Family 1 Member 1 | SLC1A1 | P43005 |
| Protein Tyrosine Kinase 2 Beta | PTK2B | Q14289 |
| Neuropeptide Y receptor Y5 | NPY5 | Q15761 |
| Sphingosine-1-Phosphate Receptor 2 | S1PR2 | O95136 |
| Lysophosphatidic Acid Receptor 2 | LPAR2 | P13569 |
| Sphingosine-1-Phosphate Receptor 3 | S1PR3 | Q99500 |
| Sphingosine-1-Phosphate Receptor 1 | S1PR1 | P21453 |
| Platelet Derived Growth Factor Receptor Alpha | PDGFRA | P11309 |
| Isoprenylcysteine Carboxyl Methyltransferase | ICMT | O60725 |
| Monoglyceride Lipase | MGLL | Q99685 |
| 5-Hydroxytryptamine Receptor 2B | HTR2B | P22303 |
| Glycogen Phosphorylase L | PYGL | P30518 |
| Polo Like Kinase 1 | PLK1 | P06213 |
| NIMA related kinase 2 | NEK2 | P51955 |
| NIMA related kinase 6 | NEK6 | Q15746 |
| Carbonic Anhydrase 5A | CA5A | P35218 |
| NUAK Family Kinase 1 | NUAK1 | P43405 |
| Hydroxysteroid 17-Beta Dehydrogenase 1 | HSD17B1 | P14061 |
| Adenosine A3 Receptor | ADORA3 | P0DMS8 |
| Protein Tyrosine Phosphatase Receptor Type S | PTPRS | Q13332 |
| Methylpurine-DNA Glycosylase | MPG | P53350 |
| Tankyrase | TNKS | O95271 |
| Dynamin 1 | DNM1 | Q05193 |
| Dopamine Receptor D3 | DRD3 | P35462 |
| Quinoid Dihydropteridine Reductase | QDPR | P09417 |
| N-Ribosyldihydronicotinamide:Quinone Reductase 2 | NQO2 | P25024 |
| cell division cycle 25B | CDC25B | P30305 |
| [The melanocortin 1 receptor](https://pubmed.ncbi.nlm.nih.gov/10885670/) | MC1R | P56817 |
| Acetyl-CoA Carboxylase Beta | ACACB | O00763 |
| Glutamate Ionotropic Receptor AMPA Type Subunit 1 | GRIA1 | O60285 |
| Dopamine Receptor D5 | DRD5 | P42330 |
| Dopamine Receptor D1 | DRD1 | P21728 |
| Pim-2 proto-oncogene, serine/threonine kinase | PIM2 | Q9UNQ1 |
| Gamma-Aminobutyric Acid Type A Receptor Subunit Alpha5 | GABRA5 | P11511 |
| Bombesin Receptor Subtype 3 | BRS3 | P32247 |
| SUZ12 Polycomb Repressive Complex 2 Subunit | SUZ12 | Q15022 |
| RB binding protein 4 | RBBP4 | P43166 |
| Bromodomain Containing 3 | BRD3 | Q15059 |
| poly (A) binding protein cytoplasmic 1 | PABPC1 | P11940 |
| Cell Division Cycle 25C | CDC25C | O43570 |
| Eukaryotic Translation Initiation Factor 4H | EIF4H | P22748 |
| Phospholipase A2 Group IVB | PLA2G4B | Q9H2K2 |
| Cholinergic Receptor Muscarinic 5 | CHRM5 | P03372 |
| Glucagon Receptor | GCGR | Q92731 |
| Sigma Non-Opioid Intracellular Receptor 1 | SIGMAR1 | Q99720 |
| Recombinant Human SUMO E1 | SAE1 | Q9UBE0 |
| Histone deacetylase 8 | HDAC8 | Q9BY41 |
| Cholinergic receptor nicotinic alpha 4 subunit | CHRNA4 | P10721 |
| Sodium Voltage-Gated Channel Alpha Subunit 9 | SCN9A | P15121 |
| Lysine Demethylase 4A | KDM4A | Q15078 |
| Cholinergic Receptor Muscarinic 4 | CHRM4 | P21397 |
| Cholinergic receptor nicotinic alpha 5 subunit | CHRNA5 | P30532 |
| Solute Carrier Family 18 Member A2 | SLC18A2 | Q09540 |
| Solute Carrier Family 18 Member A3 | SLC18A3 | Q16572 |
| MAPK Interacting Serine/Threonine Kinase 2 | MKNK2 | P49841 |
| Protein tyrosine kinase 6 | PTK6 | Q13882 |
| Histone deacetylase 10 | HDAC10 | Q969S8 |
| Tubulin Beta 1 Class VI | TUBB1 | Q9H47B |
